# Supplementary material
Source: Springer Nature journal article supplement (https://www.springermedizin.de/resource/supplementary/12936_2012_2056_MOESM10_ESM.PDF/9542450)
Supplement: MOESM10 [file 9542450]

**Additional File 10: Dihydroartemisinin Estimated Quantity**

| <b>Drug Name (Source)</b>           | <b>Trial-1</b> | <b>Trial-2</b> | <b>Trial-3</b> | <b>Average</b> | <b>SD</b>   | <b>Expected</b> | <b>Percent</b> | <b>Pre-dilution percent‡</b> |
|-------------------------------------|----------------|----------------|----------------|----------------|-------------|-----------------|----------------|------------------------------|
| 28. Artemos-40 (Tropic)             | 5.33           | 6.27           | 4.60           | 5.40           | 0.84        | 8.79            | 61%            | 63%                          |
| 29. P-Alaxin* (Adler)               | 7.42           | 7.96           | 7.91           | 7.76           | 0.30        | 8.79            | 88%            | 83%                          |
| 30. Alaxin (K. Somuah & Sons)       | 7.61           | 8.46           | 8.77           | 8.28           | 0.60        | 8.79            | 94%            | 86%                          |
| 31. Alaxin (Tropic)                 | 7.73           | 9.26           | 8.11           | 8.36           | 0.80        | 8.79            | 95%            | 81%                          |
| 32. Alaxin (GA Boateng)             | 7.29           | 8.69           | 8.46           | 8.14           | 0.75        | 8.79            | 93%            | 82%                          |
| 33. P-Alaxin† (Aseda)               | 0.50           | 0.58           | 0.56           | 0.55           | 0.04        | 0.99            | 56%            | 46%                          |
| <b><i>Euratesim (Sigma-Tau)</i></b> | <b>8.92</b>    | <b>8.51</b>    | <b>9.14</b>    | <b>8.86</b>    | <b>0.32</b> | <b>8.79</b>     | <b>101%</b>    | <b>101%</b>                  |

\* Expired; † Powder form, expected molarity is based on estimate of amount of drug in ~2g; ‡ Pre-dilution percentage kept to demonstrate that estimates of drug concentration are contingent upon correct dilution, and because IC-50s were performed with these concentrations.
